# Supplementary material
Source: PubMed Central journal article supplement (PMC3283868)
Supplement: supp_125.2.287_JCS090464TableS1.pdf [file supp_125.2.287_JCS090464TableS1.pdf]

**Table S1. Primer sequences for real-time PCR**

| Species | Gene           | Forward                         | Reverse                     |
|---------|----------------|---------------------------------|-----------------------------|
| mouse   | Orai1          | 5'-CCGGCTTCGCCATGGTAGCG-3'      | 5'-CCCAGCAGAGCAGCACGACC-3'  |
|         | $\beta$ -actin | 5'-CATGAAGATCAAGATCATTGCTCCT-3' | 5'-GCTGATCCACATCTGCTGGAA-3' |
