# Supplementary material
Source: PubMed Central journal article supplement (PMC3283868)

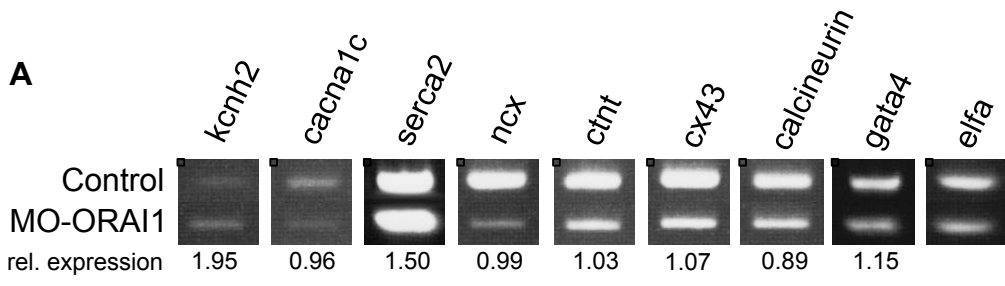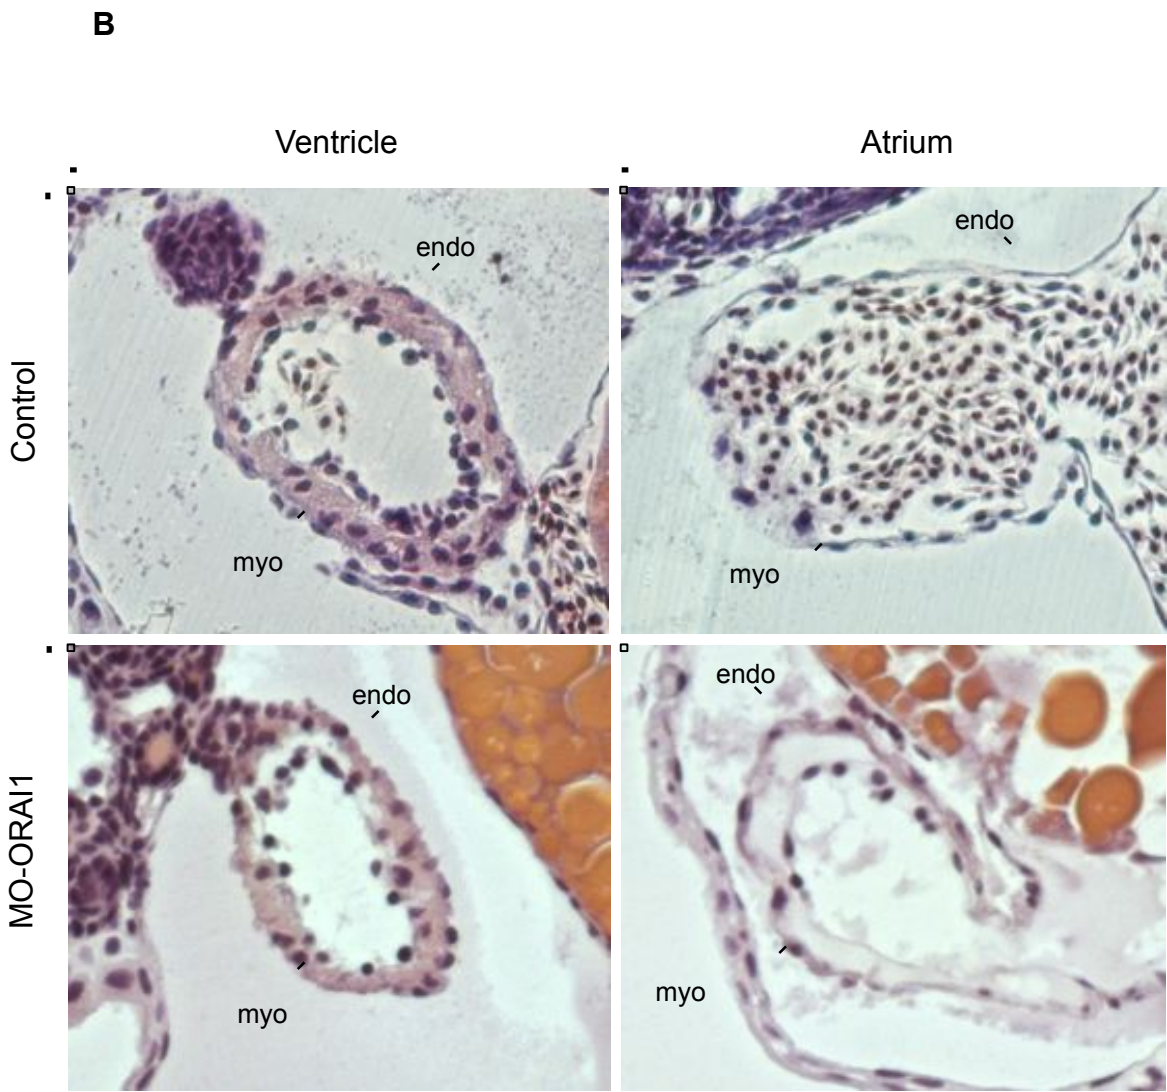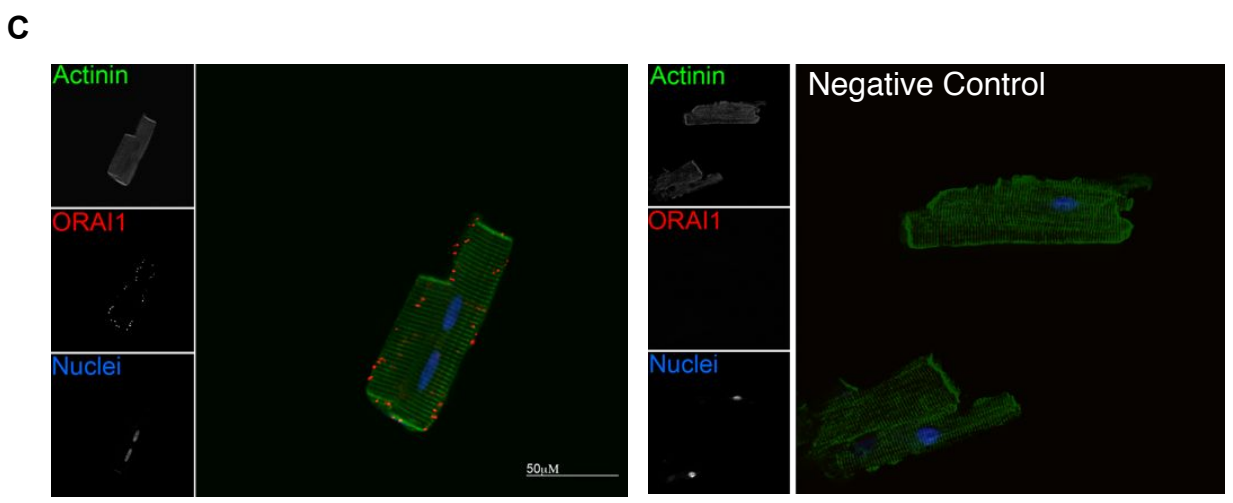

Supplement: supp_125.2.287_JCS090464FigS2.pdf [file supp_125.2.287_JCS090464FigS2.pdf]

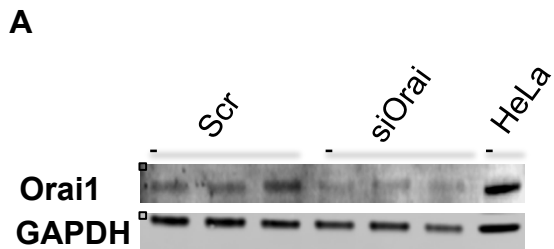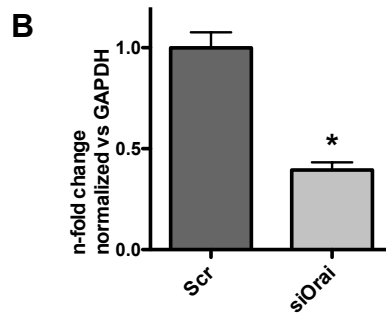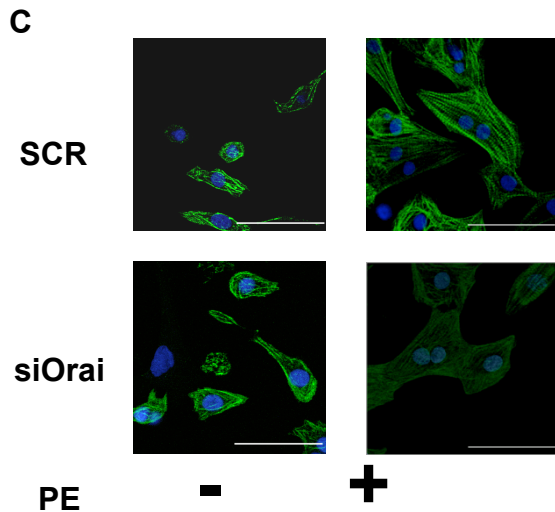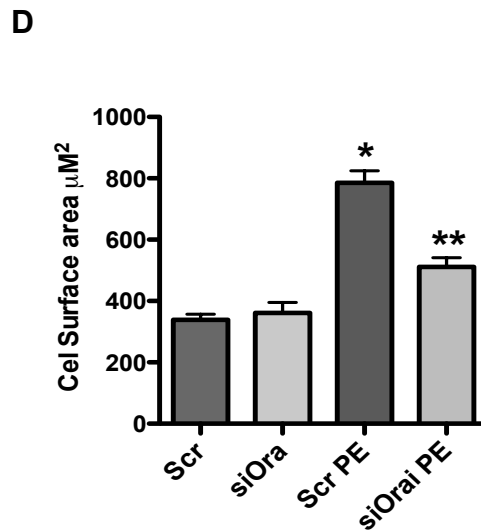

Supplement: supp_125.2.287_JCS090464FigS3.pdf [file supp_125.2.287_JCS090464FigS3.pdf]
